# Supplementary material for: Global Variations in the Mineral Content of Bottled Still and Sparkling Water and a Description of the Possible Impact on Nephrological and Urological Diseases
Source: MDPI journal article supplement (doi:10.3390/jcm10132807), 2021-06-27
Supplement: s1 [file s1]

Table S1: The mineral composition (mg/L) of bottled still and sparkling water by country

| Water brands per country |           |                     | Mineral composition (mg/L) |         |           |           |        |           |
|--------------------------|-----------|---------------------|----------------------------|---------|-----------|-----------|--------|-----------|
|                          |           |                     | Bicarbonate                | Calcium | Magnesium | Potassium | Sodium | Sulphates |
| EUROPE                   |           |                     |                            |         |           |           |        |           |
| Belgium                  | Still     | Albert Heijn        |                            | 10.4    |           |           | 0      |           |
|                          |           | Bar le Duc          | 170                        | 47      |           |           | 10.6   |           |
|                          |           | Boni                | 345                        | 59      |           |           | 59     |           |
|                          |           | Bru                 | 180                        | 21      | 20        | 2         | 8      | 19        |
|                          |           | Chaudfontaine       | 305                        | 65      | 18        | 2         | 44     | 40        |
|                          |           | Contrex             | 372                        | 468     | 74        | 0         | 9      | 1121      |
|                          |           | Everyday Aurelie    |                            | 106     |           |           | 3.5    |           |
|                          |           | Everyday CristalRoc | 200                        | 73      |           |           | 4.5    |           |
|                          |           | Everyday Louise     | 432                        | 66      |           |           | 50     |           |
|                          |           | Evian               | 360                        | 80      | 26        | 1         | 6      | 12        |
|                          |           | Hépar               | 383.7                      | 549     | 119       | 4         | 14.2   | 1530      |
|                          |           | Montcalm            | 5.2                        | 3       | 0.7       | 0.6       | 2.2    | 10        |
|                          |           | Nestlé PureLife     |                            | 70      |           |           | 2      |           |
|                          |           | Ordal               | 317                        | 143     | 7         | 5         | 17     | 0         |
|                          |           | Rocheval            | 297                        | 96      |           |           | 10.6   |           |
|                          |           | Spa reine           | 15                         | 4       | 1         | 0         | 3      | 4         |
|                          |           | Val                 | 220                        | 6       | 1.8       | 8.5       | 125    | 18        |
|                          |           | Valvert             |                            | 67.6    |           |           | 1.9    |           |
|                          |           | Vittel              |                            | 240     |           |           | 5.2    |           |
|                          |           | Volvic              |                            | 12      |           |           | 12     |           |
|                          | Sparkling | Spa Bruis           | 18                         | 6       | 2         | 1         | 5      | 8         |
|                          |           | Chaudfontaine       | 305                        | 65      | 18        | 2         | 44     | 40        |

|                  |                   |       |      |      |      |      |      |
|------------------|-------------------|-------|------|------|------|------|------|
|                  | Bru               | 180   | 21   | 20   | 2    | 8    | 19   |
|                  | Ordal             | 317   | 143  | 7    | 5    | 17   | 0    |
|                  | Val               | 220   | 6    | 2    | 10   | 125  | 18   |
|                  | Bar le Duc        | 170   | 47   |      |      | 10.6 |      |
|                  | Sourcy            | 180   |      |      |      | 10   |      |
|                  | San Pelligrino    |       | 174  |      |      | 33.3 |      |
|                  | Perrier           | 430   | 160  |      | 0    | 9    | 33   |
| <b>France</b>    |                   |       |      |      |      |      |      |
| <i>Still</i>     | Abatilles         | 127   | 19   | 9    | 4    | 100  | 8    |
|                  | Aix Les Bains     | 337   | 68   | 35   | 1.6  | 9    | 61   |
|                  | Celtic            | 48    | 10.5 | 4    | 1.9  | 1.1  | 6    |
|                  | Contrex           | 372   | 468  | 74.5 | 2.8  | 9.4  | 1121 |
|                  | Courmayeur        | 130   | 565  | 56   | 2.8  | 0.6  | 1477 |
|                  | Evian             | 360   | 80   | 26   | 1    | 6.5  | 14   |
|                  | Hépar             | 383.7 | 549  | 119  | 4.1  | 14.2 | 1530 |
|                  | Ondine            | 163.5 | 46.1 | 4.3  | 3.5  | 6.3  | 9    |
|                  | Vittel            | 384   | 240  | 42   | 1.9  | 5.2  | 400  |
|                  | Volvic            | 71    | 11.5 | 8    | 6.2  | 11.6 | 8.1  |
| <i>Sparkling</i> | Wattwiller        | 135   | 35   | 11   | 1    | 3    | 24   |
|                  | Badoit            | 1250  | 153  | 80   | 11   | 180  | 35   |
|                  | Chateldon         | 2075  | 383  | 49   | 35   | 240  | 20   |
|                  | Orezza            | 710   | 185  | 16.5 | 1.55 | 6.9  | 14   |
|                  | Perrier           | 420   | 150  | 3.9  | <1   | 9.6  | 25.3 |
|                  | Rozana            | 1837  | 301  | 160  | 52   | 493  | 230  |
|                  | Sainte Marguerite | 812   | 71   | 40   | 33   | 302  | 59   |
|                  | Saint-Yorre       | 4368  | 90   | 11   | 110  | 1708 | 174  |
|                  | Salvetat          | 530   | 160  | 7.5  | 2    | 5    | 20   |
|                  | Vals              | 1100  | 22.2 | 13.5 | 33.8 | 381  | 45.1 |

| Vichy Celestin |                               | 104  |       | 1.8  |      | 7.47 |      | 9.01 |  |
|----------------|-------------------------------|------|-------|------|------|------|------|------|--|
| Germany        |                               |      |       |      |      |      |      |      |  |
| Still          | Adelholzener Naturell         | 431  | 94.7  | 30.4 | 0.6  | 4.6  | 6.9  |      |  |
|                | Aqua Nordic Naturell          | 195  | 92.0  | 3.7  | 0    | 19   |      |      |  |
|                | Bad Pyrmonter Naturell        | 253  | 53    | 24.5 | 0.9  | 5.2  | 9    |      |  |
|                | Black Forest                  | 30.5 | 6.7   | 2.6  | 1.7  | 1.1  | 2.9  |      |  |
|                | Carolinen Naturelle           | 317  | 421   | 43   | 4.3  | 14.8 | 950  |      |  |
|                | Christinen Carat Naturelle    | 282  | 106   | 8.4  | 1.5  | 11.4 | 61   |      |  |
|                | Contrex                       | 372  | 468   | 74.5 |      | 9.4  | 1121 |      |  |
|                | Evian                         | 360  | 80    | 26   | 1    | 6.5  | 14   |      |  |
|                | Extaler Mineralquell Naturell | 266  | 373   | 62.1 | 1.6  | 10.8 | 900  |      |  |
|                | Gerolsteiner Naturell         | 577  | 125   | 44   | 5    | 17   | 24   |      |  |
|                | Heppinger Extra Heil Water    | 2495 | 150   | 199  | 27.1 | 481  | 80   |      |  |
|                | Ja! Mineral water Still 0.5L  | 189  | 67.5  | 12.5 | 1.1  | 15.2 | 59   |      |  |
|                | Ja! Mineral water Still 1.5L  | 109  | 9.4   | 3    | 1.4  | 97.7 | 40.1 |      |  |
|                | Rewe Beste Wahl Sport         | 296  | 235   | 66   | 3.1  | 46   | 548  |      |  |
|                | Rewe Beste Wahl Still         | 353  | 142   | 32.4 | 2.8  | 15   | 162  |      |  |
|                | San Benedetto                 | 296  | 51.4  | 29.7 | 0.97 | 6    | 4.2  |      |  |
|                | Share                         | 274  | 39.7  | 21.2 | 1.2  | 17.6 | 8.1  |      |  |
|                | Staatl. Fachingen             | 1846 | 98.7  | 59.2 | 16.1 | 564  | 39   |      |  |
|                | Vilsa Naturelle               | 175  | 47    | 3.6  | 2    | 16.4 | 10   |      |  |
|                | Vio                           | 152  | 51    | 5.3  |      | 15   | 19   |      |  |
|                | Vittel                        | 248  | 94    | 20   |      | 7.7  | 120  |      |  |
|                | Volvic Naturelle              | 74   | 12    | 8    | 6    | 12   | 9    |      |  |
|                | Vöslauer Ohne                 | 249  | 114.4 | 40.9 | 1.8  | 14   | 223  |      |  |
| Voss           | 20                            | 5    | 1     |      | 6    |      |      |      |  |
| Sparkling      | Adelholzener Classic          | 345  | 70.9  | 32   | 1.1  | 13.3 | 28   |      |  |
|                | Adelholzener Sanft            | 345  | 70.9  | 32   | 1.1  | 13.3 | 28   |      |  |

|                                |      |      |      |      |      |      |
|--------------------------------|------|------|------|------|------|------|
| Apollinaris Classic            | 1800 | 90   | 120  | 30   | 470  | 100  |
| Apollinaris Medium             | 1800 | 90   | 120  | 30   | 470  | 100  |
| Aqua Nordic Classic            | 195  |      | 3.7  | 92   | 19   |      |
| Aqua Nordic Medium             | 195  |      | 3.7  | 92   | 19   |      |
| Bad Pyrmont Classic            | 253  | 53   | 24.5 | 0.9  | 5.2  | 9    |
| Bad Pyrmont Light Pearly       | 253  | 53   | 24.5 | 0.9  | 5.2  | 9    |
| Bad Pyrmont Medium             | 253  | 53   | 24.5 | 0.9  | 5.2  | 9    |
| Carolinen Classic              | 317  | 421  | 43   | 4.3  | 14.8 | 950  |
| Carolinen Medium               | 317  | 421  | 43   | 4.3  | 14.8 | 950  |
| Christinen Carat Spritzig      | 483  | 53   | 4.7  | 9.4  | 292  | 120  |
| Extaler Mineralquell Classic   | 266  | 373  | 62.1 | 1.6  | 10.8 | 900  |
| Extaler Mineralquell Medium    | 266  | 373  | 62.1 | 1.6  | 10.8 | 900  |
| Gerolsteiner Medium            | 1816 | 348  | 108  | 11   | 118  | 38   |
| Gerolsteiner Sprudel           | 1816 | 348  | 108  | 11   | 118  | 38   |
| Graf Rudolf Quelle fresh       | 456  | 107  | 11   | 2.5  | 22.1 | 1.1  |
| Graf Rudolf Quelle mild        | 456  | 107  | 11   | 2.5  | 22.1 | 1.1  |
| Hella Mineral Water Classic    | 155  | 62   | 2.3  |      | 7.2  | 39   |
| Hella Water                    | 155  | 62   | 2.3  |      | 7.2  | 39   |
| Ja! Classic 0.5L               | 189  | 67.5 | 12.5 | 1.1  | 15.2 | 59   |
| Ja! Classic 1.5L               | 118  | 24.9 | 7.4  | 2.2  | 136  | 34.1 |
| Ja! Medium 0.5L                | 189  | 67.5 | 12.5 | 1.1  | 15.2 | 59   |
| Ja! Medium 1.5L                | 56   | 17.6 | 5.8  | 1.3  | 34   | 25.1 |
| Mineau Classic                 | 408  | 142  | 51.6 | 3    | 170  | 418  |
| Mineau Medium                  | 203  | 41.1 | 3.2  | 3    | 29.9 | 4    |
| Rewe Beste Wahl Classic        | 353  | 142  | 32.4 | 2.8  | 15   | 162  |
| Rewe Beste Wahl Medium         | 353  | 142  | 32.4 | 2.8  | 15   | 162  |
| San Benedetto Elite Prickelend | 296  | 51.4 | 29.7 | 0.97 | 6    | 4.2  |
| San Pellegrino Medium          | 243  | 164  | 49.5 | 2.2  | 31.2 | 402  |

|               |                  |                     |        |       |      |      |      |       |
|---------------|------------------|---------------------|--------|-------|------|------|------|-------|
|               |                  | Share Medium        | 274    | 39.7  | 21.2 | 1.2  | 17.6 | 8.1   |
|               |                  | Share Prickelend    | 274    | 39.7  | 21.2 | 1.2  | 17.6 | 8.1   |
|               |                  | Vilsa Classic       | 175    | 47    | 3.6  | 2    | 16.4 | 10    |
|               |                  | Vilsa Leichtperlig  | 175    | 47    | 3.6  | 2    | 16.4 | 10    |
|               |                  | Vilsa Medium        | 175    | 47    | 3.6  | 2    | 16.4 | 10    |
|               |                  | Vio Medium          | 152    | 51    | 5.3  |      | 15   | 19    |
|               |                  | Volvic Leightperlig | 74     | 12    | 8    | 6    | 12   | 9     |
|               |                  | Vöslauer Mild       | 249    | 114.4 | 40.9 | 1.8  | 14   | 223   |
|               |                  | Vöslauer Pricklend  | 249    | 114.4 | 40.9 | 1.8  | 14   | 223   |
| <b>Greece</b> |                  |                     |        |       |      |      |      |       |
|               | <i>Still</i>     | Ab                  | 236.25 | 79.65 | 4.24 | 0.87 | 4.35 | 15.53 |
|               |                  | Arethousa           | 286    | 64    | 19   |      | 7.8  | 6     |
|               |                  | Avra                | 182    | 60    | 8.9  | 1.2  | 9    | 14    |
|               |                  | Dirfys              | 286    | 64    | 19   |      | 7.8  | 6     |
|               |                  | Erymanthos          | 308    | 95.5  | 8.5  | 1    | 30   | 14.7  |
|               |                  | Korpi               | 314.8  | 106.5 | 3.3  | 0.68 | 4.7  | 5     |
|               |                  | Marata              | 236.25 | 79.65 | 4.24 | 0.87 | 4.35 | 15.53 |
|               |                  | Samaria             | 160    | 31    | 14   | 0.5  | 7    | 5     |
|               |                  | Theoni              | 149    | 42    | 1    | 0.26 | 1.8  | 5     |
|               |                  | Vikos               | 270    | 93.1  | 1.9  | 0.7  | 2.6  | 12.2  |
|               |                  | Yas                 | 250    | 98    | 7    |      | 4.9  | 11    |
|               |                  | Zagori              | 244    | 83    | 3.06 | 1.02 | 2.85 | 9.15  |
|               |                  | Zaros               | 135    | 28.2  | 12.8 | 0.6  | 6.7  | 5     |
|               | <i>Sparkling</i> | Ab                  | 384    | 45    | 53   |      | 20   | 16    |
|               |                  | Ioli Fizzy          | 274    | 59.3  | 20.8 |      | 7.33 | 10.5  |
|               |                  | Korpi Fyssalis      | 304.3  | 100.8 | 2.5  |      | 4.7  | 5     |
|               |                  | Mitsikeli Vikos     | 215    | 73.6  | 0.5  |      | 1.4  | 5     |
|               |                  | Souroti             | 781    | 188   | 55   | 0.2  | 85   |       |

| Xino Nero Florinas  |               |                      | 945.81 | 233.9 | 27.2 |      | 4.43 | 12.2 |
|---------------------|---------------|----------------------|--------|-------|------|------|------|------|
| Italy               |               |                      |        |       |      |      |      |      |
| Still               | Acqua Panna   | 106                  | 32.2   | 6.5   | 0.8  | 6.6  | 22   |      |
|                     | Chiarella     | 217.8                | 40.6   | 22.1  | 0.2  | 0.9  | 8.6  |      |
|                     | Lauretana     | 5                    | 1.5    | 0.42  | 0.19 | 1    |      |      |
|                     | Levissima     | 56.8                 | 19.9   | 1.7   | 1.6  | 2.1  | 16.9 |      |
|                     | Norda         | 50                   | 11.8   | 3.7   | 0.82 | 2.2  | 6    |      |
|                     | Pejo          | 54                   | 19     | 4.9   | 1.9  | 2.2  | 27.2 |      |
|                     | Primula       | 355                  | 91     | 33.2  | 0.78 | 9.8  |      |      |
|                     | Rocchetta     | 185.4                | 60.36  | 3.73  | 0.35 | 3.87 | 7.54 |      |
|                     | Rosalpe       | 27                   | 5.6    | 3.9   | 0.24 | 0.8  |      |      |
|                     | San Benedetto | 296                  | 51.4   | 29.7  | 2.97 | 6    | 4.2  |      |
|                     | San Bernardo  | 31                   | 10.2   | 0.48  | 0.48 | 0.8  | 1.5  |      |
|                     | Sangemini     | 1010                 | 323    | 16.5  | 3.85 | 19.6 |      |      |
|                     | Vitasnella    | 324                  | 95     | 34    | 1.5  | 3.7  | 91   |      |
|                     | Sparkling     | Acqua Pam            |        | 3.7   | 0.6  | 0.56 | 1.3  | 3.6  |
|                     |               | Brio Rossa Rochhetta | 182.1  | 57.36 | 3.23 | 0.35 | 4.13 | 6.75 |
| Ferrarelle          |               | 1500                 | 400    | 25    | 49   | 50   | 4.8  |      |
| Lete                |               | 930                  | 310    | 13.2  | 1.82 | 5.1  |      |      |
| Levissima Frizzante |               | 57.4                 | 20.4   | 1.8   | 1.6  | 1.9  | 16.1 |      |
| Nestle Vera         |               | 147                  | 35.6   | 12.7  | 0.5  | 2    | 19.9 |      |
| San Benedetto       |               | 296                  | 51.4   | 29.7  | 0.97 | 6    | 4.2  |      |
| San Bernardo        |               | 27.9                 | 9.1    | 0.6   | 0.4  | 0.8  | 2.6  |      |
| San Pellegrino      |               | 243                  | 164    | 49.5  | 2.2  | 31.2 | 402  |      |
| Sant'Anna           | 10            | 2.9                  |        |       | 1.5  |      |      |      |
| the Netherlands     |               |                      |        |       |      |      |      |      |
| Still               | Acqua Panna   | 106                  | 32.2   | 6.5   | 0.8  | 22   | 22   |      |
|                     | Albert Heijn  | 360                  |        |       | 2.7  | 5    |      |      |

|                  |                          |       |      |      |      |      |      |
|------------------|--------------------------|-------|------|------|------|------|------|
|                  | Albert Heijn Basic       | 280   | 104  | 3.7  | 1.8  | 3.7  | 52   |
|                  | Bar le Duc               | 170   | 47   | 3.4  | 0.6  | 10.6 | <1   |
|                  | Chaudfontaine            | 305   | 65   | 18   | 2.5  | 44   | 40   |
|                  | Cristaline               | 432   | 66   | 26   | 18   | 50   | 34   |
|                  | Dalphin                  | 212   | 71   | 6.5  | 3.3  | 30   | 37   |
|                  | Evian                    | 360   | 80   | 26   | 1    | 6.5  | 14   |
|                  | Jumbo                    | 190   | 97   | 10.8 | 3.4  | 18.5 |      |
|                  | Just Water               |       | 15   | 2.35 | 0.35 | 50.4 | 35   |
|                  | Montcalm                 | 5.2   | 3    | 0.7  | 0.6  | 2.2  | 10   |
|                  | Natural Cool             |       | 89.5 |      | 3.6  | 36.2 |      |
|                  | Solan de Cabras          | 284   | 60   | 26.7 | 1    | 4.8  |      |
|                  | Sourcy                   | 180   | 49   | 6    | 1    | 10   | 10   |
|                  | Spa                      | 17    | 5    | 2    | 0.5  | 3    | 4    |
|                  | Tavina Elegantia         | 36.5  | 7.86 | 2.46 |      |      |      |
| <i>Sparkling</i> | Albert Heijn             | 360   |      |      | 2.7  | 5    |      |
|                  | Albert Heijn Basic       | 257   | 98   | 2    | 0.6  | 3.1  | 33   |
|                  | Bar le Duc               | 170   | 47   | 3.4  | 0.6  | 10.6 | <1   |
|                  | Chaudfontaine            | 305   | 65   | 18   | 2.5  | 44   | 40   |
|                  | Cristaline               |       | 66   | 26   | 18   | 50   |      |
|                  | Dalphin                  | 212   | 71   | 6.5  | 3.3  | 30   | 37   |
|                  | Gerolsteiner Medium      | 181.6 | 34.8 | 10.8 | 1.1  | 11.8 | 3.8  |
|                  | Hébron                   | 360   | 105  | 16   | 3    | 6    | 41   |
|                  | Jumbo                    | 190   | 97   | 10.8 | 3.4  | 18.5 |      |
|                  | Jumbo Slightly sparkling | 367   | 142  | 20   | 3    | 6    |      |
|                  | Natural Cool             |       | 89.2 |      | 3.6  | 39.2 |      |
|                  | Perrier                  | 420   | 150  | 3.9  | <1   | 9.6  | 25.3 |
|                  | San Pelligrino           |       | 164  | 49.5 | 2.2  | 31.2 |      |
|                  | Sourcy                   | 180   | 49   | 6    | 1    | 10   | 10   |

|                  |  |                         |        |       |       |      |       |       |
|------------------|--|-------------------------|--------|-------|-------|------|-------|-------|
|                  |  | Spa Finesse             | 70     | 11    | 5.5   | 1    | 9     | 8.5   |
|                  |  | Spa Intense             | 18     | 5.5   | 1.9   | 0.5  | 5     | 7.5   |
|                  |  | Tavina Elegantia Vivace | 36.5   | 7.86  | 2.46  |      |       |       |
| <b>Poland</b>    |  |                         |        |       |       |      |       |       |
| <i>Still</i>     |  | Aquarel Nestle          | 482.3  | 112.2 | 24.3  | 4    | 13    | 0     |
|                  |  | Arctic                  | 260.1  | 74.15 | 13.37 | 1.35 | 8.12  | 25.64 |
|                  |  | Cisowianka              | 542.6  | 131.2 | 22.48 | 0.78 | 10.71 | 2.58  |
|                  |  | Dobrowinka              | 276.9  | 58.12 | 33.42 | 0    | 2     | 0     |
|                  |  | Górska Natura           | 104    | 25.2  | 6.47  | 1.93 | 1.04  | 0     |
|                  |  | Jurajska                | 329.9  | 66.1  | 32.8  | 2.2  | 10    | 40.5  |
|                  |  | Kropla Beskidu          | 186.7  | 44.09 | 17.01 | 1    | 11.1  | 43.62 |
|                  |  | Mama I Ja               | 165    | 43.6  | 5.05  | 1.06 | 9.7   | 13.3  |
|                  |  | Nałęczowianka           | 453.7  | 110.2 | 23.1  | 2.8  | 11    | 0     |
|                  |  | Piwniczanka             | 1260   | 180.8 | 87    | 13   | 133   | 32    |
|                  |  | Ustronianka             | 299    | 98.1  | 16.52 | 1.21 | 6.44  | 41.8  |
|                  |  | Żywiec Zdrój            | 1403.7 | 41.69 | 5.62  | 0    | 9.65  | 0     |
| <i>Sparkling</i> |  | Kinga Pienińska         | 335.6  | 97.8  | 13.13 | 2.3  | 4.59  | 28.5  |
|                  |  | Muszynianka             | 1260   | 180.9 | 152.7 | 7    | 63    | 32    |
|                  |  | Staropolanka            | 1550   | 301   | 51.6  | 48.9 | 118   | 27.3  |
| <b>Romania</b>   |  |                         |        |       |       |      |       |       |
| <i>Still</i>     |  | Buzias (light)          |        | 74.85 | 28.2  |      | 190.4 |       |
|                  |  | Herculane               |        | 61.53 | 3.06  |      | 0.62  |       |
|                  |  | Apa Craiului            |        | 62.8  | 1.5   |      | 2.96  |       |
|                  |  | Keia                    |        | 43.8  | 2.92  |      | 1.44  |       |
|                  |  | Perla Covasnei          |        | 24.8  | 11.8  |      | 90    |       |
|                  |  | Aqua Carpatica          | 193    | 45.8  | 13    |      | 0.8   |       |
|                  |  | Azuga                   | 161    | 43.2  | 6.29  | 0.75 | 2.59  |       |
|                  |  | Borsec                  | 329    | 55.1  | 32.8  |      | 2.07  |       |



|                  |                          |        |        |       |       |        |       |
|------------------|--------------------------|--------|--------|-------|-------|--------|-------|
|                  | Dorna                    | 191.05 | 62.73  | 1.46  | 0.4   | 0.93   |       |
|                  | Bucovina                 | 225.7  | 60.6   | 8.7   | 1.7   | 7.4    | 19.29 |
|                  | Aquatique                | 112.21 | 33.69  | 1.46  |       | 0.93   | <16   |
|                  | Carpatina (light)        |        | 98.51  | 41.35 |       | 18.08  |       |
| <i>Sparkling</i> | Buzias                   |        | 74.85  | 28.2  |       | 190.4  |       |
|                  | Apa Craiului             |        | 72.1   | 1.41  |       | 1.15   |       |
|                  | Stanceneni               |        | 86.71  | 38.25 |       | 22.55  |       |
|                  | Lipova                   |        | 101.9  | 33.63 |       | 109.2  |       |
|                  | Carpatina (forte)        |        | 104.1  | 44.18 |       | 15.41  |       |
|                  | Poiana Negri (apriga)    |        | 254.6  | 48.56 |       | 218    |       |
|                  | Poiana Negri (cumpatata) |        | 252.6  | 48.56 |       | 218    |       |
|                  | Biborteni                |        | 265.5  | 86.15 |       | 213.4  |       |
|                  | Valea Izvoarelor         |        | 47.02  | 9.66  |       | 93     |       |
|                  | Bucovina                 |        | 155.2  | 48.04 |       | 20.3   |       |
|                  | Aqua Carpatica           | 171    | 41.2   | 11.4  |       | 1.39   |       |
|                  | Perla Apusenilor         | 1738.5 | 428.5  | 66.23 | 6.85  | 47.21  | 0.53  |
|                  | Perla Harghitei          | 648    | 104    | 39.3  | 8.56  | 51.4   | 1.27  |
|                  | Tusnad                   | 1364.5 | 236.24 | 78.65 | 11.75 | 293.75 |       |
|                  | Poiana Negri             | 1116.9 | 217.8  | 27.4  |       | 205    |       |
|                  | Zizin                    | 244    | 77.1   | 3112  | 1.09  | 8.81   | <40   |
|                  | Perenna Premier          | 327.3  | 94.9   | 7.7   | 0.57  | 1.76   | 15.8  |
|                  | Dorna                    |        | 300.1  | 12.51 |       | 21.5   |       |
|                  | Perla Covasnei           |        | 24.8   | 11.8  |       | 90     |       |
| <b>Russia</b>    |                          |        |        |       |       |        |       |
| <i>Still</i>     | Chernogolovskaya         | 245    | 55.3   | 21.4  | 4.34  | 4.7    | 8.5   |
|                  | Pine cone forest         | 171    | 0.92   | 0.28  | 0.56  | 86.4   | 12.5  |
|                  | Bon aqua                 | 9      | 21.2   | 21.1  | 0.17  | 2.93   | 103   |
|                  | Aqua mineral             | 7      | 0.21   | 8.32  | 0.76  | 9.01   | 31    |

|                  |                    |        |      |      |      |      |      |
|------------------|--------------------|--------|------|------|------|------|------|
|                  | Saint spring       | 82     | 25.7 | 7.44 | 0.46 | 4.10 | 6.8  |
|                  | Evian              | 355    | 85.1 | 27.3 | 1.09 | 7.03 | 13.2 |
|                  | Senezhskaya        | 351    | 70.4 | 29.1 | 11.3 | 5.96 | 5.4  |
|                  | Baikal             | 67     | 17.5 | 3.44 | 1.03 | 3.85 | 5.4  |
|                  | Vittel             | 395    | 247  | 45.4 | 2.42 | 5.48 | 373  |
|                  | Svetla             | 383    | 75.7 | 38.9 | 1.33 | 5.48 | 11.5 |
|                  | Nestle PureLife    | 45     | 24.9 | 6.22 | 12.7 | 11.2 | <0.5 |
|                  | Dzhigem            | 152    | 76.6 | 17.4 | 1.95 | 9.02 | 95.5 |
|                  | Okay               | 146    | 43.3 | 19.9 | 4.51 | 6.12 | 55   |
|                  | What you need      | 272    | 81.9 | 37.7 | 7.98 | 10.5 | 111  |
|                  | Glaceau Smartwater | 11     | 70.6 | 5.58 | 5.34 | 0.16 | <0.5 |
|                  | Arhiz              | 165    | 32.5 | 12.4 | 1.7  | 9.29 | 7.1  |
|                  | SelterS            | 258.15 | 67.1 | 20.7 | 2.35 | 8.86 | 27   |
|                  | Novoterskaya       | 34     | 19.8 | 2.25 | 1.03 | 2.56 | 7.9  |
| <i>Sparkling</i> | Pine cone forest   | 330    | 101  | 30.8 | 1.92 | 17.7 | 24.6 |
|                  | Pine cone forest 2 | 125    | 1.1  | 0.28 | 0.54 | 84.8 | 13   |
|                  | Bon aqua           | 243    | 35.6 | 20.7 | 0.2  | 135  | 3.2  |
|                  | Aqua mineral       | 0      | 0.22 | 7.95 | 0.74 | 10.9 | 30   |
|                  | Saint spring       | 31     | 22.2 | 6.54 | 0.39 | 3.52 | 6.4  |
|                  | Lipetsk            | 209    | 106  | 39.7 | 20.6 | 1065 | 1320 |
|                  | Seven streams      | 528    | 13.2 | 4.51 | 11.6 | 274  | 90   |
|                  | Perrier            | 395    | 160  | 4.25 | 0.49 | 10.1 | 17.2 |
|                  | Borjomi            | 3754   | 142  | 43.5 | 26.2 | 1590 | 4    |
|                  | Jigem              | 123    | 64.3 | 14.7 | 1.85 | 16.8 | 81   |
|                  | Arhiz              | 144    | 28.5 | 11.0 | 1.5  | 8.81 | 7.1  |
|                  | What you need      | 228    | 77.5 | 35.4 | 7.56 | 9.91 | 54   |
|                  | Okay               | 107    | 40.2 | 18.1 | 4.16 | 5.96 | 2.7  |
|                  | Senezhskaya        | 308    | 54.0 | 23.0 | 8.58 | 4.62 | 5.4  |

|                  |                     |        |       |       |       |       |       |
|------------------|---------------------|--------|-------|-------|-------|-------|-------|
|                  | Bonvida             | 325    | 67.6  | 27.8  | 6.96  | 4.9   | 4.5   |
|                  | 365 days            | 0      | 0.58  | 0.28  | 0.30  | 15.8  | <0.5  |
|                  | Narzan              | 1478   | 512   | 109   | 9.14  | 195   | 391   |
|                  | Pilgrim             | 83     | 21.6  | 3.47  | 1.25  | 8.46  | 10.1  |
| <b>Serbia</b>    |                     |        |       |       |       |       |       |
| <i>Still</i>     | Glaceau Smart water |        | 65    | 4.8   | 4.7   |       |       |
|                  | Vlasinska Rosa      | 42.7   | 9.6   | 0.82  | 1     | 2.7   | 5.2   |
|                  | Jana                | 381    | 63.8  | 32    | 0.6   | 1.8   | 7.2   |
|                  | Aqua Viva           | 314    | 90    | 13    | 1.8   | 11.5  | 24    |
|                  | Sara                | 254.4  | 48    | 25.3  |       | 2.1   | 10    |
|                  | Prolom voda         | 74.5   | 3     | 0.1   | 0.5   | 48.3  | 2.5   |
|                  | Radenska            | 280    | 56    | 20    | 0.8   | 7.6   | 1     |
|                  | Ukusi moga kraja    | 400.8  | 66.2  | 39.5  | 1.1   | 4.56  | 20.4  |
|                  | Vlasina             | 30.5   | 7.42  | 4.27  |       | 1.4   | 1.31  |
|                  | Vrnjci              | 451.2  | 64.21 | 36.88 | 4.41  | 54.21 | 39.12 |
|                  | Golijaska ledena    | 79.3   | 20.44 | 3.64  | 0.27  | 0.79  | 8.52  |
|                  | Raj                 | 451    | 123   | 19    | 0.5   | 3.9   | 11.7  |
|                  | Jazak               | 423    | 80    | 41.8  | 3.8   | 6.1   | 24.7  |
|                  | Saint John`s        | 377.2  | 78.1  | 21    | 1.28  | 7.5   | 11.4  |
|                  | Tronoša             |        | 85    | 39.3  | 0.579 | 1.67  |       |
|                  | Heba Natural        | 225.7  | 56.1  | 14.9  | 3.84  | 30.6  | 43    |
|                  | Aqua Gala           | 402    | 62.1  | 34    | 2     | 14.4  | 13    |
|                  | Voda Voda           | 305    | 75.6  | 14.9  | 2.12  | 10.6  | 7.1   |
|                  | Element             | 134.2  | 33.82 | 10.56 | 0.402 | 1.61  | 8.81  |
|                  | Acqua Panna         | 106    | 32.2  | 6.5   | 0.8   | 6.6   | 22    |
|                  | Evian               | 360    | 79.9  | 26    | 1     | 6.62  | 12    |
|                  | Tesla voda          | 604    | 130   | 53    | 4.7   | 45.8  | 90.5  |
| <i>Sparkling</i> | Heba Strong         | 3202.5 | 70    | 15.4  | 57.3  | 1060  | 199.8 |

|              |                          |        |       |       |      |       |       |
|--------------|--------------------------|--------|-------|-------|------|-------|-------|
|              | Radenska                 | 2100   | 230   | 79    | 79   | 520   | 100   |
|              | Donat Mg                 | 7500   | 390   | 1000  |      | 1500  | 2200  |
|              | Knjaz Miloš              | 1251   | 110   | 54    | 20.2 | 255   | 11    |
|              | K plus voda              | 400.8  | 66.2  | 39.5  | 1.01 | 4.56  | 20.4  |
|              | Aqua Gala                | 396.5  | 62.8  | 31.5  | 2    | 14.1  | 8.1   |
|              | Saint John's             | 377.2  | 78.1  | 21    | 1.28 | 11.4  | 7.5   |
|              | Jazak                    | 423    | 80    | 41.8  | 3.8  | 6.1   | 24.7  |
|              | Karađorđe                | 1214   | 109   | 68    | 47.3 | 200.7 | 39    |
|              | Voda Vrnjci              | 959.8  | 67.84 | 51.32 | 30   | 200.6 | 39.96 |
|              | Jamnica                  | 2246   | 114   | 43    | 27.1 | 805   | 116.1 |
|              | Sarajevski kiseljak      | 1805.6 | 248.5 | 41.3  | 16.8 | 598   | 490   |
|              | Mg mivela                | 2064.8 | 22.1  | 343   | 9.5  | 131.9 | 0.3   |
| <b>Spain</b> |                          |        |       |       |      |       |       |
| <i>Still</i> | Agua de Cuevas           | 246.9  | 47    | 25.4  |      | 1.6   | 13.5  |
|              | Agua del Rosal           | 295    | 65.4  | 13.7  |      | 45.2  |       |
|              | Agua del Valle del Cardo |        | 81    | 35    |      | 7     | 19    |
|              | Agua Sana                | 2.1    | 0.4   | 0.7   |      | 5.8   | 1.5   |
|              | Aguas de San Joaquín     | 165    | 35.7  | 16.5  |      | 8.3   | 3.7   |
|              | Aigua mineral Bonpreu    | 147.2  | 47.07 | 7.27  |      | 8.4   | 29.1  |
|              | Alzola                   | 188    | 58.7  | 6.3   |      | 45.5  | 24.4  |
|              | AquaBona Fontoira        | 152    | 3.4   | 7.5   |      | 11    | 8.9   |
|              | AquaBona Fuenmayor       | 305    | 77    | 20.8  |      | 1.6   | 22.8  |
|              | AquaBona Peña Umbría     | 298    | 55    | 28    |      | 5.4   | 7.3   |
|              | AquaBona Santolin        | 274    | 92.4  | 2.73  |      | 2     | 6.5   |
|              | Aquadeus                 | 323    | 74.2  | 23.4  | 0.9  | 3.3   | 20.4  |
|              | Aquarel                  | 14.7   | 1.9   | 2.1   |      | 4.7   | 2.9   |
|              | Auchan                   | 168    | 28.8  | 19.7  | 1.7  | 8     | 13.5  |
|              | Benassal                 | 264    | 89.9  | 2.96  |      | 2.6   | 21.3  |

|                          |       |      |      |     |      |      |
|--------------------------|-------|------|------|-----|------|------|
| Bezoya                   | < 5   | 2.86 | 0.36 |     | 2.04 |      |
| Cabreiroà                | 193   | 10   | 5    | 2.1 | 58.2 |      |
| Caldes de Boi            | 34.6  | 5.4  | 0.5  |     | 21.7 | 13.2 |
| Carrefour                | 266   | 21.5 |      | 3.5 | 94.7 | 11.5 |
| Castrovita               | 118   | 39   | 2    | < 1 | 2    | 3    |
| Fonsana                  | 38    | 7    |      |     | 7    | 3    |
| Font Agudes del Montseny | 253   | 58.9 | 16.8 |     | 29.7 | 41.2 |
| Font de Pla Nova         | 270   | 74   | 36   | 1.2 | 11   |      |
| Font del Pi              | 317   | 67   | 66   |     | 27   | 207  |
| Font del Regàs           | 129.2 | 32.9 | 4.1  |     | 13.5 | 10.2 |
| Font d'Or                | 78.8  | 26.4 | 3.2  |     | 9.2  | 13.7 |
| Font Jaraba              | 297   | 99.6 | 32   |     | 37.1 | 144  |
| Font Major               | 173   | 54.5 | 7.7  |     | 9.5  | 14.2 |
| Font Natura              | 205.6 | 70.9 | 15.7 |     | 8.9  | 57   |
| Font Selva               | 249   | 34   | 6.8  | 1   | 54.9 | 14.6 |
| Font Vella               | 167   | 43.2 | 11.5 |     | 1.3  |      |
| Fontecabras              | 295   | 90.1 | 37.5 |     | 32.6 | 117  |
| Fontecelta               | 266   | 21.5 |      | 3.5 | 94.7 | 11.5 |
| Fuensanta                | 162   | 58   | 4.5  | 0.9 | 5.8  | 17.5 |
| Fuente Bruma             | 75.9  | 10.7 | 8.3  |     | 13.1 | 3.7  |
| Fuente Liviana           | 268.3 | 65.4 | 17   | 0.4 | 0.8  | 19.2 |
| Fuente Primavera         | 297.2 | 88.7 | 23.4 |     | 18.6 | 43.9 |
| Fuentedueñas             | 246   |      | 7.4  |     | 3    | 6.7  |
| Insalus                  | 149   | 162  | 20.6 |     | 10.7 | 374  |
| La Platina               | 79    | 16   | 16   |     | 9    | 18   |
| Lanjaròn                 | 108   | 28.9 | 11.4 |     | 5.9  |      |
| Les Creus                | 119   | 28   | 7.3  | 1   | 11.7 | 12.3 |
| Lunares                  | 292   | 96.3 | 35.7 | 2.3 | 39   | 142  |

|                    |                      |       |       |      |      |      |       |
|--------------------|----------------------|-------|-------|------|------|------|-------|
|                    | Marquesado           | 273.3 | 75.3  | 19.3 | 0.5  | 1.2  | 30.1  |
|                    | Mondariz             | 156   | 7.7   | 5.5  | 5.1  | 49   | 1.7   |
|                    | Monte Pinos          | 298   | 93.8  | 3.4  |      | 1.8  | 1.6   |
|                    | Na Taconera          | 275   | 144   | 28   |      | 49   |       |
|                    | Ribagorza            | 331   | 67    | 27   |      | 24   | 18    |
|                    | Ribes                | 146   | 46.6  | 7    |      | 5.6  |       |
|                    | San Vicente          | 109   | 14.9  | 9.8  | 2.6  | 14.2 | 9.9   |
|                    | Sant Aniol           | 349   | 91.3  | 17.5 |      | 6.4  |       |
|                    | Sierra Cazorla       | 408.7 | 78.6  | 48.5 | 0.46 | 1.26 | 64    |
|                    | Solan de Cabras      | 284   | 60    | 26.7 | 1    | 4.8  | 21.8  |
|                    | Solares              | 249   | 75.2  | 15.6 | 1.7  | 91.1 | 37.2  |
|                    | Sousas               | 77.7  |       | 1.1  | 1.8  |      |       |
|                    | Valtorre             | 174   | 22.1  | 22   |      | 32.5 | 22.3  |
|                    | Veri                 | 140   | 32.1  | 9.2  |      | 0.5  | 3.3   |
|                    | Viladrau             | 113   | 27.7  | 4.5  |      | 11.9 | 11.2  |
| <i>Sparkling</i>   | AquaBona Peña Umbría | 298   | 55    | 28   |      | 5.4  | 7.3   |
|                    | AquaBona Santolín    | 276   | 90.4  | 2.7  |      | 2.1  | 6.9   |
|                    | Cortes de Arenoso    | 267.1 | 86.8  | 7.8  | 1    | 7.7  | 16    |
|                    | Firgas               | 406   | 58.2  | 31.1 |      | 42.6 | 6.9   |
|                    | Fonteide             | 53.6  | 6.5   | 4.1  | 9    | 21.3 | 4.9   |
|                    | Fontenova            | 193.1 | 6.5   | 3.2  | 5.5  | 65   | 10.5  |
|                    | Fonter               | 127   | 32    | 7.3  |      | 7.4  | 8.9   |
|                    | Malavella            | 2214  | 53.7  |      | 49.4 | 1115 | 47.7  |
|                    | San Narciso          | 2132  | 51.4  |      |      | 1080 | 47    |
|                    | San Pellegrino       | 237.9 | 185.6 | 52.5 | 2.5  | 35   | 443.8 |
|                    | Vichy Catalan        | 2081  |       |      | 50.7 | 1097 | 49.6  |
|                    | Vilajuiga            | 1790  | 85.3  | 44.1 | 28   | 591  |       |
| <b>Switzerland</b> |                      |       |       |      |      |      |       |

|                  |                           |       |       |      |      |      |       |
|------------------|---------------------------|-------|-------|------|------|------|-------|
| <i>Still</i>     | Adelbodner Cristal        | 284   | 579   | 39   | 1.4  | 6.5  | 1268  |
|                  | Adello Mineral            | 291   | 530   | 36.5 | 1.7  | 5.8  | 1127  |
|                  | Allegra                   | 344.2 | 100.4 | 23.7 | 0.7  | 2.6  | 59.3  |
|                  | Appenzell Mineral Leise   | 407   | 108   | 17   | 0.7  | 3    | 3.8   |
|                  | Aproz Cristal             | 250   | 360   | 70   | 2.5  | 6    | 930   |
|                  | Aquella Cristal           | 245   | 300   | 75   | 2.5  | 4    | 840   |
|                  | Valais Naturelle          | 225   | 90    | 22   | 2.5  | 7    | 110   |
|                  | Aquina Rot                | 246   | 174   | 33.5 | 2.8  | 4.4  | 362   |
|                  | Arkina Blau               | 355   | 85    | 25.7 | 0.8  | 8.9  | 40.8  |
|                  | Cristallo Still           | 254   | 221   | 65.4 | 2.7  | 4.3  | 597   |
|                  | Cristalp without CO2      | 227.6 | 115.3 | 40.7 | 1.9  | 21.9 | 240.7 |
|                  | Eden                      | 91.8  | 33.5  | 3.1  | 2.9  | 4.3  | 29.5  |
|                  | Elmer Mineral without CO2 | 242   | 118   | 6.6  | 0.6  | 2.5  | 117   |
|                  | Eptinger Still            | 278   | 510   | 117  | 2.5  | 4.2  | 1445  |
|                  | Farmer Mineral Blau       | 287   | 546   | 35   |      | 6    | 1256  |
|                  | Henniez Blau              | 389   | 104   | 20   | 1    | 7    | 12    |
|                  | Knutwiler Grün            | 375   | 89    | 24   | 1.2  | 5    | 20    |
|                  | M-Budget without CO2      | 80    | 100   | 20   | 0.5  | 5    | 280   |
|                  | OK.- Mineralwasser Blau   | 194   | 37.3  | 15.2 | 0.98 | 4.42 | 8.7   |
|                  | Saguaro Nature            | 277   | 136   | 42   |      | 1.8  | 268   |
|                  | San Clemente Naturale     |       | 8.4   | 1.5  |      | 1.8  | 7.8   |
|                  | Swiss Alpina Rot          | 239   | 208   | 37   | 1.9  | 5.2  | 480   |
|                  | Valser Silence            | 155   | 53.7  | 1.5  | 0.2  | 0.2  | 10    |
|                  | Zurzacher Naturelle       | 278   | 53.3  | 7.8  | 5.8  | 154  | 170   |
| <i>Sparkling</i> | Adelbodner Mineral        | 284   | 579   | 39   | 1.4  | 6.5  | 1268  |
|                  | Adello Mineral            | 291   | 530   | 36.5 | 1.7  | 5.8  | 1127  |
|                  | Allegra Finin             | 344.2 | 100.4 | 23.7 | 0.7  | 2.6  | 59.3  |
|                  | Appenzell Mineral Laut    | 407   | 108   | 17   | 0.7  | 3    | 3.8   |

|               |                        |       |        |      |      |      |       |
|---------------|------------------------|-------|--------|------|------|------|-------|
|               | Aproz Classic          | 250   | 360    | 70   | 2.5  | 6    | 930   |
|               | Aquilla Classic        | 245   | 300    | 75   | 2.5  | 4    | 840   |
|               | Aquina Blau            | 246   | 174    | 33.5 | 2.8  | 4.4  | 362   |
|               | Arkina Grün            | 355   | 85     | 25.7 | 0.8  | 8.9  | 40.8  |
|               | Cristallo Prickelnd    | 254   | 221    | 65.4 | 2.7  | 4.3  | 597   |
|               | Cristella Blau         | 249   | 287    | 71   |      |      | 798   |
|               | Cristalp with CO2      | 227.6 | 115.3  | 40.7 | 1.9  | 21.9 | 240.7 |
|               | Elmer Mineral with CO2 | 242   | 118    | 6.6  | 0.6  | 2.5  | 117   |
|               | Eptinger Prickelnd     | 278   | 510    | 117  | 2.5  | 4.2  | 1445  |
|               | Farmer Mineral Rot     | 287   | 546    | 35   |      | 6    | 1256  |
|               | Henniez Rot            | 389   | 104    | 20   | 1    | 7    | 12    |
|               | Knutwiler Blau         | 375   | 89     | 24   | 1.2  | 5    | 20    |
|               | M-Budget with CO2      | 235   | 95     | 26   | 2    | 7    | 140   |
|               | Meltinger              | 0.4   | 581.61 | 91   | 2    | 4.95 | 1443  |
|               | OK- Mineralwasser Rot  | 194   | 37.3   | 15.2 | 0.98 | 4.42 | 8.7   |
|               | Passugger              | 771.3 | 210.8  | 22.4 | 2.7  | 41.2 | 50.7  |
|               | Prix Garantie          | 263   | 257    | 44.5 | 1.9  | 3.9  | 573   |
|               | Rhözünser              | 1196  | 230    | 48.6 | 7.1  | 153  | 141   |
|               | Saguaro Classic        | 277   | 136    | 42   |      | 1.8  | 268   |
|               | San Clemente Frizzante |       | 8.4    | 1.5  |      | 1.8  | 7.8   |
|               | Swiss Alpina Blau      | 239   | 208    | 37   | 1.9  | 5.2  | 480   |
|               | Valais Pétillante      | 225   | 90     | 22   | 2.5  | 7    | 110   |
|               | Valser                 | 366   | 435    | 54.5 | 1.4  | 9.4  | 988   |
|               | Zurzacher Classic      | 270   | 12.4   | 0.2  | 6.3  | 282  | 258   |
| <b>Turkey</b> |                        |       |        |      |      |      |       |
| <i>Still</i>  | Ice Mountain           | 150   | 40.8   | 7.5  | 1.7  | 17.8 | 6     |
|               | Bleu                   | 134   | 29     |      | 2    | 4    | 3     |
|               | Cactus                 | 112   | 28     | 1.9  | 2.2  | 2.8  | 3     |



|                       |                        |       |      |      |      |      |     |
|-----------------------|------------------------|-------|------|------|------|------|-----|
|                       | Dassani                | 111   | 32   | 2.1  | 1.8  | 0    | 2.8 |
|                       | Meadows                | 289   | 59   | 24   | 0.4  |      | 7   |
|                       | Evian                  | 71    | 11.5 | 8    | 6.2  | 1.15 | 8.1 |
|                       | Volvic                 | 125   | 33   | 2.1  | 2.3  | 2.6  | 2.3 |
|                       | Cano                   | 195   | 37.1 | 15.6 | 2.7  | 4.5  | 9.9 |
|                       | Fiji                   | 15.2  | 1.8  | 1.5  | 0.5  | 1.8  | 0.1 |
|                       | Aqua                   | 64    | 15   | 5.7  | 2.1  | 12   |     |
|                       | pH Balancer            |       | 1.5  | 1.2  | 1.9  | 1.2  |     |
|                       | pH Infinity            | 71    | 17.5 | 3.2  | 5.2  | 17.5 | 9.1 |
|                       | Vitel                  | 384   | 240  | 42   | 2.2  | 5.2  | 400 |
|                       | Life                   | 125   | 32   | 2.1  | 2.3  | 2.8  | 3   |
| <i>Sparkling</i>      | H-two-O                | 45    | 5    |      | 45   | 128  |     |
|                       | Cano                   | 205   | 37.1 | 15.6 |      | 4.5  |     |
|                       | Oldenladia             |       |      |      |      | 123  |     |
|                       | Gerolsteiner           | 1816  | 348  | 108  | 11   | 118  | 38  |
|                       | Evian Blue             | 360   | 80   | 26   | 1    | 6.5  | 14  |
|                       | Badoit                 | 1250  | 153  | 80   | 11   | 189  | 35  |
| <b>United Kingdom</b> |                        |       |      |      |      |      |     |
| <i>Still</i>          | Aqua Pura              | 20    | 14   | 3.5  | 2.5  | 12   | 14  |
|                       | Aquavia                | 74.25 | 1.4  |      | 0.36 | 65   |     |
|                       | Buxton                 | 248   | 55   | 19   | 1    | 24   | 13  |
|                       | Evian                  | 360   | 80   | 26   | 1    | 6.5  | 14  |
|                       | Harrogate              | 215   | 57   | 19   |      | 8    | 13  |
|                       | Highland               | 150   | 40.5 | 10.1 | 0.7  | 5.6  | 5.3 |
|                       | Hildon                 |       | 98.5 | 1.62 |      | 7.03 | 6.6 |
|                       | Nestlé PureLife        | 184.6 | 59   | 10   | 1.2  | 11.9 | 9.7 |
|                       | Sainsbury's Caledonian | 240   | 55   | 16   | 2    | 15   | 28  |
|                       | Tesco Ashbeck          | 25    | 11   | 3.5  | 2.5  | 10   | 11  |

|                  |                          |       |       |      |      |      |      |
|------------------|--------------------------|-------|-------|------|------|------|------|
| <i>Sparkling</i> | Volvic                   | 74    | 12    | 8    | 6    | 12   | 9    |
|                  | Buxton                   | 248   | 55    | 19   | 1    | 24   | 13   |
|                  | Harrogate                | 215   | 57    | 19   |      | 8    | 13   |
|                  | Highland Spring          | 150   | 40.5  | 10.1 | 0.7  | 5.6  | 5.3  |
|                  | Hildon Natural           |       | 104   | 1.8  |      | 7.47 | 9.01 |
|                  | Sainsbury's Caledonian   | 240   | 55    | 16   | 2    | 15   | 28   |
|                  | San Pellegrino           | 245   | 174   | 51.4 | 2.2  | 33.3 | 430  |
| <b>AUSTRALA</b>  |                          |       |       |      |      |      |      |
| <b>Australia</b> |                          |       |       |      |      |      |      |
| <i>Still</i>     | K2 sport life            | 130   | 24    | 3.3  | 2.2  | 41   | 8.1  |
|                  | Acqua Panna              | 106   | 32    | 6.5  | 0.8  | 6.6  | 22   |
|                  | Islantic Water           |       | 6.4   | 2.4  | 0.6  | 11   | 3.4  |
|                  | Pureau                   | 0     |       |      |      | 0    |      |
|                  | Aqua love                |       |       |      |      | 12   |      |
|                  | Alka Power               | 1     | 7.5   | 0.05 | 0.2  | 1    |      |
|                  | Balance                  |       |       |      |      |      |      |
|                  | Evian                    | 360   | 80    | 26   | 1    | 6.6  | 14   |
|                  | Voss                     | 12    | 4     | 1    | 0    | 4    | 5    |
|                  | Fiji                     | 152   | 18    | 15   |      |      |      |
|                  | Yaru                     |       | 39    | 18   |      |      |      |
|                  | Tasmanian Mountain Water | 31.92 | 4.6   |      | 3.79 |      |      |
|                  | Moore's ultra pure       |       | 0     | 0    |      | 0    |      |
|                  | Just Water Spring        | 140   | 17    | 25   | 9    | 29   |      |
|                  | Ossa spring              |       | 31.95 |      |      | 3.79 |      |
|                  | E'stel                   | 90    | 2.2   | 0.03 | 0.13 | 42   | 1.3  |
| <i>Sparkling</i> | Nu                       |       |       |      |      | 1.9  |      |
|                  | Capi Mineral             | 200   | 20    | 29   | 21   | 31   | 6    |
|                  | Perrier                  | 420   | 150   | 3.9  | 1    | 9.6  | 25.3 |

|                      |                          |      |       |      |      |      |      |
|----------------------|--------------------------|------|-------|------|------|------|------|
|                      | Mount Franklin           |      |       |      |      | 5    |      |
|                      | Santa Vittoria           | 185  | 36.5  | 18.5 | 0.45 | 0.61 |      |
|                      | Sparkling Italian        | 226  | 41.2  | 22.3 | 0.2  | 0.95 |      |
|                      | Voss                     | 240  | 4     | 1    | 0    | 9    | 5    |
|                      | San Pelligrino           | 243  | 164   | 49.5 | 2.2  | 31.2 | 40   |
|                      | Yarra Sparkling          |      | 39    | 18   |      |      |      |
|                      | Coles carbonated mineral |      |       |      | 10   |      |      |
|                      | Ossa sparkling           |      | 31.95 |      |      | 3.79 |      |
| <b>NORTH AMERICA</b> |                          |      |       |      |      |      |      |
| <b>Canada</b>        |                          |      |       |      |      |      |      |
| <i>Still</i>         | Gerolsteiner             | 1816 | 348   | 108  | 11   | 118  | 38   |
|                      | San Benedetto            | 296  | 51    | 29   | 0.97 | 6    | 4.2  |
|                      | Glace                    |      |       | 0.2  |      | 1.02 | 0.85 |
|                      | Saint-Justin             | 560  | 7     | 6    | 3    | 415  | 0    |
|                      | Galvanina                | 330  | 82    | 23   | 1.3  | 15   | 28   |
|                      | Jackson Springs          | 210  | 42    | 13.2 | 1.3  | 0    | 0    |
|                      | Zagori                   | 244  | 72.8  | 3.8  | 0.62 | 1.96 | 6.33 |
|                      | Eska                     | 82   | 25    | 4    | 1    | 3    | 8    |
|                      | Thunderbird              | 30   | 11    | 0.4  | 0.1  | 1    | 2    |
|                      | Icelandic glacial        | 33   | 6     | 2    | 1    | 11   | 3    |
|                      | Aquadeco                 | 170  | 48    | 19   | 1.6  | 3.6  | 14   |
|                      | Fuji                     | 152  | 18    | 15   | 5    | 18   | 1    |
|                      | Flow water               | 298  | 73    | 29   | 2    | 8    | 11.1 |
|                      | waiakea                  | 34   | 6     | 3    | 2    | 6    | 4    |
|                      | De l'Aubier              | 35   | 2     | 2    | 16   | 5    | 2    |
| <i>Sparkling</i>     | Gize                     | 115  | 286   | 9.5  | 1.9  | 36.1 | 692  |
|                      | Perrier                  | 420  | 150   | 4    | 1    | 10   | 25   |
|                      | San Pellegrino           | 243  | 164   | 49.5 | 2.2  | 31.2 | 402  |

|                      |                      |       |      |      |      |      |      |
|----------------------|----------------------|-------|------|------|------|------|------|
|                      | Nestlé PureLife      | 2     | 13   | 4.4  | 0    | 6.5  | 42   |
|                      | Abenakis             | 70    | 90   | 60   | 15   | 720  | 125  |
|                      | Zagori               | 237   | 86.1 | 5.9  | 0.7  | 2.1  | 7.8  |
|                      | San Benedetto        | 296   | 51   | 29   | 0.97 | 6    | 4.2  |
|                      | San Giorgio          | 176.6 | 27.8 | 26   | 2.5  | 52.8 | 11.4 |
|                      | Penguin Ice          | 107   | 48   | 22   | 3.8  | 18   | 30   |
|                      | Clearly Canadian     | 190   | 42   | 16   | 4.2  | 4.9  | 18   |
|                      | Montellier           | 77    | 42   | 12   | 1    | 10   | 17   |
| <b>United States</b> |                      |       |      |      |      |      |      |
| <i>Still</i>         | Dasani               |       |      |      |      |      | 10   |
|                      | Poland Spring        |       | 5.6  | 0.84 |      | 5.6  | 5    |
|                      | Acqua Panna          |       | 32   | 6.4  |      | 6.9  | 21   |
|                      | Arrowhead            | 81.1  | 20.4 |      | 1.5  | 11.1 | 3.8  |
|                      | Deer Park            |       | 11   | 2.1  |      | 7.6  | 5.7  |
|                      | Ice Mountain         |       | 11   | 2.1  |      | 7.6  | 5.6  |
|                      | Nestlé PureLife      |       | 11   | 4.4  |      | 3.9  | 16   |
|                      | Poland Spring Origin |       | 4.8  | 1.3  |      | 1.6  | 3.8  |
|                      | Fiji                 | 155   | 18   | 15   | 4.9  | 18   | 0.7  |
|                      | Zephyr Hills         |       |      |      |      |      |      |
|                      | Mountain Valley      | 230   | 68   | 7.4  | 1.3  |      | 9    |
|                      | Crystal Geyser       | 69    |      | 5.7  | 1.5  | 12   | 2.1  |
|                      | Hawaiian Springs     |       | 6.4  | 3.4  | 2.3  | 6.7  | 4.6  |
|                      | Evian                | 360   | 93   | 32   |      | 6.7  | 13   |
|                      | Volvic               | 76    | 13   | 8.7  | 6.5  | 12   | 8.8  |
| <i>Sparkling</i>     | Perrier              |       | 140  | 3.1  |      | 8.3  | 24   |
|                      | Poland Spring        |       | 6.9  | 0.99 |      |      | 5    |
|                      | San Pellegrino       |       | 170  | 45   | 2.4  | 31   | 420  |
|                      | Zephyr Hills         |       |      |      |      |      | 1.8  |

|                      |                       |        |       |       |      |       |      |
|----------------------|-----------------------|--------|-------|-------|------|-------|------|
|                      | Arrowhead             |        | 37    | 5.6   | 2.1  | 11    | 11   |
|                      | Deer Park             |        | 6.4   | 2.4   |      | 3.3   | 20   |
|                      | Ice Mountain          |        | 6.4   | 2.4   |      | 3.3   | 20   |
|                      | Nestlé PureLife       |        | 14.9  | 4.29  |      |       | 25.5 |
|                      | Topo Chico            |        | 120   | 11    | 3.6  |       | 180  |
| <b>SOUTH AMERICA</b> |                       |        |       |       |      |       |      |
| <b>Brazil</b>        |                       |        |       |       |      |       |      |
| <i>Still</i>         | Crystal               | 105.81 | 4.72  | 0.94  | 2.3  | 34.4  | 1.56 |
|                      | Nestlé Pureza Vital   | 169.14 | 31    | 16.5  | 3.99 | 4.18  | 1.11 |
|                      | Minalba               | 110.78 | 16.8  | 11.1  | 1.24 | 1.21  | 0.13 |
|                      | Prata                 | 50.71  | 8.5   | 4.07  | 2.76 | 2.39  | 2.95 |
|                      | Bioleve               | 87.42  | 13.3  | 8.06  | 1.4  | 3.57  |      |
|                      | Ibira                 | 79.81  | 6.02  |       | 4.4  | 91    |      |
|                      | Schin                 | 52     | 8.99  | 1.29  | 1.42 | 6.80  | 1.31 |
|                      | Inga                  | 11.62  | 0.91  | 1.55  | 0.34 | 0.39  | 0.13 |
|                      | Agua de Pedra         | 131.99 | 26.48 | 5.14  | 1.04 | 22.84 |      |
|                      | Agua Cristalina       | 1.98   |       | 0.05  |      |       | 0.93 |
|                      | Vitalis               | 5.1    | 0.8   | 0.5   |      | 6.2   |      |
|                      | Aquarel               | 13.2   | 2.2   | 2.3   |      | 4.7   | 3.7  |
|                      | Fonteide              | 56.9   | 5.8   | 4.3   | 8.5  | 20.3  | 4.9  |
|                      | Serra Catarinense     | 95.49  | 18.68 | 4.71  | 0.57 | 6.77  | 0.36 |
|                      | Raposo                | 21.62  | 3.43  | 2.10  | 1.22 | 3.34  | 4.35 |
|                      | Serra da Estrela      | 16.5   | 2.7   |       |      | 4.4   |      |
|                      | Leve-Pura da Natureza | 36.39  | 5.75  | 2.42  | 4.78 | 5.2   |      |
|                      | Fonte Pouso Alto      | 34.19  | 4.40  | 3.10  | 1.36 | 3.33  | 2.35 |
|                      | Petropolis            | 7.14   | 3.85  | 2.20  | 2.50 | 13.93 | 1.82 |
| <i>Sparkling</i>     | Crystal               | 100.53 | 4.17  | 0.999 | 2.48 | 16.09 | 1.75 |
|                      | Minalba               | 105.15 | 17.14 | 9.83  | 1.3  | 1.1   | 0.2  |

|              |           |                       |        |       |       |       |       |       |
|--------------|-----------|-----------------------|--------|-------|-------|-------|-------|-------|
|              |           | Prata                 | 91.29  | 15.3  | 7.15  | 3.78  | 7.61  | 6.88  |
|              |           | Bonaleve              | 10.23  | 2.08  | 0.542 | 0.845 | 1     |       |
|              |           | Sao Lourence          | 283.73 | 28.17 | 12491 | 31.35 | 36.04 | 2.17  |
|              |           | 1x Soda               |        | 13.9  | 3.9   | 3.1   | 26.1  | 38.12 |
|              |           | Agua de Pedra         | 122.83 | 25.18 | 4.44  | 1.09  | 23.02 |       |
|              |           | Perrier               | 445    | 155   | 6.8   | 1.3   | 11.8  | 46.1  |
|              |           | Raposo                | 91.52  | 26.04 | 2.87  | 1.47  | 3.94  | 6.14  |
|              |           | ASIA                  |        |       |       |       |       |       |
| India        | Still     | Komin                 | 197    | 36    | 22    | 0.1   | 1     | 3     |
|              |           | Kelzai Volcanic Water | 70     | 29    | 1     |       | 32    | 1     |
|              |           | Mulshi                |        | 15.6  | 6.2   | 4     | 6.9   | 3.2   |
|              |           | Aava                  |        | 17    | 11.5  |       | 50    |       |
|              |           | Aion                  | 58     |       |       |       |       |       |
|              |           | Bisleri               | 170    | 13.6  | 7.8   |       |       | 19.3  |
|              |           | Aquafina              |        | 33.6  | 11.7  | 0.5   | 1.8   | 6     |
|              |           | Atlas Premium         | 466.6  | 16.6  | 7.8   | 2.6   |       |       |
|              |           | Dew Drops             | 196.6  | 58.8  | 44.4  | 22.2  | 24.4  | 10.6  |
|              |           | Golden Eagle          | 50     | 22.2  | 37.7  | 2     | 1.3   | 34.4  |
|              |           | Golden Valley         |        | 8     | 4     | 4     | 8     | 4     |
|              |           | Maqua 2000            | +      | 2     |       |       |       | 35.5  |
|              |           | Kinley                |        |       | +     |       | +     | +     |
|              |           | Himalayan             | 33     |       |       |       |       | 33    |
|              | Sparkling | Perrier               | 390    | 147.3 | 3.4   | 0.6   | 9     |       |
|              |           | San Pellegrino        | 243    | 164   | 49.5  | 2.2   | 31.2  |       |
|              |           | Zoik                  |        | 41.3  | 6.2   | 13    |       |       |
|              |           | Boca                  | 155    | 22    | 10    |       | 20    |       |
|              |           |                       |        |       |       |       |       |       |
|              |           |                       |        |       |       |       |       |       |
| Saudi Arabia |           |                       |        |       |       |       |       |       |

|           |              |                    |        |       |      |      |      |      |
|-----------|--------------|--------------------|--------|-------|------|------|------|------|
| Singapore | Still        | Highland Spring    | 150    | 40.5  | 10.1 | 0.7  | 5.6  | 5.3  |
|           |              | Speyside Glenlivet | 0      | 12    | 1.6  | 0.7  | 3.9  | 4    |
|           |              | Nova               | 26     | 11    | 3.4  | 1.2  | 17   | 26   |
|           |              | Berain             | 50     | 22    | 3    | 5    | 17   | 9    |
|           |              | Arwa               | 7.7    | <1.0  | 21.1 | 1    | 3    | 74.5 |
|           |              | Hada               | 30     | 13    | 4    | 0.8  | 20   | 20   |
|           |              | Nestlé             | 42     | 36    | 4.7  | 0.2  | 16.8 | 22   |
|           |              | Hana               | 18     | 21    | 9    | 8    | 5    | 28   |
|           |              | Tannourine         | 160    | 50    | 13   | 1    | 4    | 4    |
|           |              | Solan de Cabras    | 0      | 60    | 26.7 | 1    | 4.8  | 21.8 |
|           |              | Harrogate          | 211    | 45    | 14   | 0    | 29   | 32   |
|           |              | Naqi               | 25     | 14    | 6    | 1.6  | 2    | 31   |
|           |              | Voss               | 0      | 3.7   | 0.9  | 0    | 3.8  | 2.1  |
|           |              | Panda              | 25     | 6     | 2    | 1    | 29   | 30   |
|           |              | View               | 6.1    | 29.6  | 0.75 | 1.4  | 1    | 3    |
|           | Sparkling    | Highland Spring    | 150    | 40.5  | 10.1 | 0.7  | 5.6  | 5.3  |
|           |              | Souroti            | 744    | 182   | 54   | 11   | 78   |      |
|           |              | Perrier            | 420    | 150   | 3.9  | 1    | 9.6  | 25.3 |
|           |              | San Pellegrino     | 0      | 166   | 49.5 | 2.1  | 30   | 401  |
|           |              | Montana            | 48     | 10    | 3.8  | 0.26 | 0.3  | 1.6  |
|           |              | Voss               | 0      | 3.7   | 0.9  | 0    | 122  | 2.1  |
|           |              | Berain             | 50     | 22    | 3    | 5    | 17   | 9    |
|           |              | Badoit             | 1250   | 153   | 80   | 11   | 180  | 35   |
|           |              | Aqua               | 0      | 296   | 86.8 | 5.16 | 9.62 | 34   |
|           |              | Kiseljak           | 1878.8 | 232.5 | 46.2 | 19.8 | 609  | 580  |
|           |              |                    |        |       |      |      |      |      |
| Still     | Ice mountain | 150                | 40.8   | 7.5   | 1.7  | 17.8 | 6    |      |
|           | Bleu         | 134                | 29     |       | 2    | 4    | <3   |      |

|                  |              |       |       |       |       |      |         |
|------------------|--------------|-------|-------|-------|-------|------|---------|
|                  | Cactus       | 112   | 28    | 1.9   | 2.2   | 2.8  | <3      |
|                  | Dassani      | 111   | 32    | 2.1   | 1.8   | 0    | <2.8    |
|                  | Meadows      | 289   | 59    | 24    | 0.4   |      | 7       |
|                  | Evian        | 71    | 11.5  | 8     | 6.2   | 1.15 | 8.1     |
|                  | Volvic       | 125   | 33    | 2.1   | 2.3   | 2.6  | <2.3    |
|                  | Cano         | 195.5 | 37.13 | 15.64 | 2.7   | 4.5  | 9.9     |
|                  | Fiji         | 15.2  | 1.8   | 1.5   | 0.5   | 1.8  | 0.1     |
|                  | Aqua         | 64    | 15    | 5.7   | 2.1   | 12   |         |
|                  | pH Balancer  |       | 1.5   | 1.2   | 1.9   | 1.2  |         |
|                  | pH Infinity  | 71    | 17.5  | 3.2   | 5.2   | 17.5 | 9.1     |
|                  | Vitel        | 384   | 240   | 42    | 2.2   | 5.2  | 400     |
|                  | Life         | 125   | 32    | 2.1   | 2.3   | 2.8  | <3      |
| <i>Sparkling</i> | Pocar sweat  |       | 20.04 | 6.07  |       | 43   | 1008.63 |
|                  | Ion water    |       | 20.04 | 33    | 195.5 | 168  |         |
|                  | H-two-O      | 45    | 5     |       | 45    | 128  |         |
|                  | Cano         | 205   | 37.13 | 15.64 |       | 4.5  |         |
|                  | Oldenladia   |       |       |       |       | 123  |         |
|                  | Gerolsteiner | 1816  | 348   | 108   | 11    | 118  | 38      |
|                  | Evian Blue   | 360   | 80    | 26    | 1     | 6.5  | 14      |
|                  | Badoit       | 1250  | 153   | 80    | 11    | 189  | 35      |
